# Supplementary material
Source: PubMed Central journal article supplement (PMC11197437)
Supplement: NIHMS2000518-supplement-Supplementary_file.pdf [file NIHMS2000518-supplement-Supplementary_file.pdf]

## Supplementary Online Content

Flegal KM, Kurszon-Moran D, Carroll MD, Fryar CD, Ogden CL. Trends in Obesity Among Adults in the United States, 2005 to 2014. *JAMA*. doi:10.1001/jama.2016.6458

**eTable 1.** Distribution of Smoking Status by Sex and Survey Cycle (Unweighted Sample Size and Weighted Prevalence): NHANES 2005-2014

**eTable 2.** Distribution of Educational Categories by Sex and Survey Cycle (Unweighted Sample Size and Weighted Prevalence): NHANES 2005-2014

**eTable 3.** *P*-Values for Statistical Tests of Factors Associated With the Prevalence of Obesity (BMI  $\geq$  30) and Class 3 Obesity (BMI  $\geq$  40): NHANES 2013-2014

**eTable 4.** Age-Adjusted Prevalence (% [95% CI]) of Obesity (BMI  $\geq$  30) and Class 3 Obesity (BMI  $\geq$  40), by Sex and Survey Years, NHANES 2005-2014

This supplementary material has been provided by the authors to give readers additional information about their work.

**eTable 1.** Distribution of Smoking Status by Sex and Survey Cycle (Unweighted Sample Size and Weighted Prevalence): NHANES 2005-2014

| Survey Cycle (Years) | Smoking Status | Men  |                   | Women |                   |
|----------------------|----------------|------|-------------------|-------|-------------------|
|                      |                | n    | % (95% CI)        | n     | % (95% CI)        |
| 2005-6               | Missing        | 0    | 0                 | 3     | 0.1(0.0 -0.3 )    |
|                      | Never          | 949  | 43.7(40.1 -47.4 ) | 1297  | 57.5(54.4 -60.5 ) |
|                      | Former         | 695  | 28.5(25.9 -31.3 ) | 418   | 21.4(19.4 -23.5 ) |
|                      | Current        | 593  | 27.7(24.5 -31.2 ) | 401   | 21.1(18.6 -23.7 ) |
| 2007-8               | Missing        | 4    | 0.1(0.0 -0.3 )    | 2     | 0.1(0.0 -0.4 )    |
|                      | Never          | 1175 | 45.3(41.6 -49.0 ) | 1727  | 59.6(56.2 -63.0 ) |
|                      | Former         | 852  | 28.2(26.2 -30.4 ) | 534   | 20.3(18.3 -22.5 ) |
|                      | Current        | 715  | 26.4(23.4 -29.6 ) | 541   | 20.0(17.5 -22.7 ) |
| 2009-10              | Missing        | 0    |                   | 0     |                   |
|                      | Never          | 1324 | 49.9(46.1 -53.6 ) | 1864  | 60.5(57.1 -63.8 ) |
|                      | Former         | 857  | 27.9(24.9 -31.2 ) | 588   | 20.9(18.5 -23.4 ) |
|                      | Current        | 708  | 22.2(20.2 -24.4 ) | 585   | 18.6(16.6 -20.8 ) |
| 2011-12              | Missing        | 4    | 0.1(0.0 -0.2 )    | 3     | 0.0(0.0 -0.1 )    |
|                      | Never          | 1209 | 48.7(44.6 -52.7 ) | 1748  | 62.4(59.0 -65.7 ) |
|                      | Former         | 721  | 27.4(24.3 -30.6 ) | 455   | 21.4(18.0 -25.2 ) |
|                      | Current        | 651  | 23.9(20.9 -27.2 ) | 390   | 16.2(13.8 -18.9 ) |
| 2013-14              | Missing        | 1    | 0.0(0.0 -0.1 )    | 0     |                   |
|                      | Never          | 1255 | 50.5(47.3 -53.7 ) | 1811  | 61.8(59.3 -64.2 ) |
|                      | Former         | 771  | 28.5(26.1 -31.0 ) | 495   | 19.2(16.9 -21.7 ) |
|                      | Current        | 611  | 21.0(18.8 -23.3 ) | 511   | 19.0(16.3 -22.0 ) |

**eTable 2.** Distribution of Educational Categories by Sex and Survey Cycle (Unweighted Sample Size and Weighted Prevalence): NHANES 2005-2014

| Survey Cycle (Years) | Educational Category | Men  |                    | Women |                   |
|----------------------|----------------------|------|--------------------|-------|-------------------|
|                      |                      | n    | % (95% CI)         | n     | % (95% CI)        |
| 2005-6               | Missing              | 3    | 0.1(0.0 -0.7 )     | 3     | 0.1(0.0 -0.4 )    |
|                      | <HS                  | 660  | 18.6(15.2 -22.5 )  | 534   | 16.4(14.0 -19.2 ) |
|                      | HS                   | 537  | 25.3(23.0 -27.8 )  | 516   | 25.0(22.9 -27.3 ) |
|                      | >HS                  | 1037 | 56.0(51.4 -60.5 )  | 1066  | 58.4(54.8 -61.9 ) |
| 2007-8               | Missing              | 1    | 0.1(0.0 -0.6)      | 5     | 0.1(0.0 -0.2 )    |
|                      | <HS                  | 858  | 21.3(18.0 -24.9 )  | 854   | 19.6(16.7 -22.8 ) |
|                      | HS                   | 701  | 26.4(22.6 -30.6 )  | 673   | 24.5(22.5 -26.6 ) |
|                      | >HS                  | 1186 | 52.2(46.2 -58.2)   | 1272  | 55.9(51.7 -60.0 ) |
| 2009-10              | Missing              | 4    | 0.2(0.1 -0.7 )     | 9     | 0.2( 0.1 -0.3 )   |
|                      | <HS                  | 824  | 18.5 (16.4 -20.9 ) | 865   | 19.2(17.4 -21.1 ) |
|                      | HS                   | 699  | 23.9(21.2 -26.9 )  | 664   | 21.9(19.8 -24.2 ) |
|                      | >HS                  | 1362 | 57.3(53.7 -60.9 )  | 1499  | 58.7(56.1 -61.3 ) |
| 2011-12              | Missing              | 2    | 0.0(0.0 -0.1 )     | 2     | 0.0(0.0 -0.1 )    |
|                      | <HS                  | 643  | 17.8(14.5 -21.6 )  | 585   | 15.7(12.3 -19.9 ) |
|                      | HS                   | 573  | 21.1(18.0 -24.7 )  | 517   | 19.4(17.1 -21.8 ) |
|                      | >HS                  | 1367 | 61.1(55.3 -66.5 )  | 1492  | 64.9(59.7 -69.7 ) |
| 2013-14              | Missing              | 2    | 0.0(0.0 -0.1 )     | 2     | 0.1(0.0 -0.3 )    |
|                      | <HS                  | 595  | 15.9(12.8 -19.5 )  | 581   | 14.7(11.7 -18.4 ) |
|                      | HS                   | 626  | 23.0(20.4 -25.8 )  | 594   | 20.4(17.5 -23.7 ) |
|                      | >HS                  | 1415 | 61.1(56.8 -65.3 )  | 1640  | 64.8(59.7 -69.5 ) |

**eTable 3.** *P*-Values for Statistical Tests of Factors Associated With the Prevalence of Obesity (BMI  $\geq$  30) and Class 3 Obesity (BMI  $\geq$  40): NHANES 2013-2014

|       |                            | <b>Obesity</b> | <b>Class 3 Obesity</b> |
|-------|----------------------------|----------------|------------------------|
| Men   | Age group                  | .364           | .766                   |
|       | Race/Hispanic origin group | .005           | .381                   |
|       | Smoking status             | .011           | .492                   |
|       | Educational category       | .895           | .617                   |
| Women | Age group                  | .020           | .014                   |
|       | Race/Hispanic origin group | <.001          | .007                   |
|       | Smoking status             | .327           | .115                   |
|       | Educational category       | .006           | .789                   |

**eTable 4. Age-Adjusted Prevalence (% (95% CI)) of Obesity (BMI  $\geq$  30) and Class 3 Obesity (BMI  $\geq$  40), by Sex and Survey Years, NHANES 2005-2014**

|                                                   | All              | Men              | Women            |
|---------------------------------------------------|------------------|------------------|------------------|
| <b>Obesity (BMI <math>\geq</math> 30)</b>         |                  |                  |                  |
| 2005-6                                            | 34.3 (31.4-37.2) | 33.3 (29.0-37.7) | 35.3 (32.4-38.4) |
| 2007-8                                            | 33.7 (31.5-36.1) | 32.2 (29.3-35.2) | 35.4 (33.1-37.8) |
| 2009-10                                           | 35.7 (33.8-37.7) | 35.5 (31.9-39.2) | 35.8 (34.0-37.7) |
| 2011-12                                           | 34.9 (32.0-37.9) | 33.5 (30.7-36.5) | 36.1 (32.6-39.9) |
| 2013-14                                           | 37.7 (35.8-39.7) | 35.0 (32.8-37.3) | 40.4 (37.6-43.3) |
| <b>Class 3 obesity (BMI <math>\geq</math> 40)</b> |                  |                  |                  |
| 2005-6                                            | 5.9 (4.9-6.9)    | 4.2 (3.2-5.3)    | 7.4 (5.9-9.1)    |
| 2007-8                                            | 5.7 (4.9-6.7)    | 4.2 (3.3-5.3)    | 7.3 (6.2-8.5)    |
| 2009-10                                           | 6.3 (5.7-7.0)    | 4.4 (3.6-5.2)    | 8.1 (7.1-9.2)    |
| 2011-12                                           | 6.4 (5.2-7.7)    | 4.4 (2.6-6.8)    | 8.3 (6.9-9.8)    |
| 2013-14                                           | 7.7 (6.3-9.4)    | 5.5 (4.2-7.0)    | 9.9 (8.1-12.1)   |
